# Supplementary material
Source: PubMed Central journal article supplement (PMC1945064)
Supplement: pbio.0050214.st001.pdf [file pbio.0050214.st001.pdf]

| Batches                 | Experiments                                                                                                                          | Days of XdU injections in respect to training days (Dn) | XdU dose (mg/kg) | Groups size                                                                     | Duration of training                        | Time of sacrifice in respect to the start of training |
|-------------------------|--------------------------------------------------------------------------------------------------------------------------------------|---------------------------------------------------------|------------------|---------------------------------------------------------------------------------|---------------------------------------------|-------------------------------------------------------|
| <b>Results section:</b> | <b><i>Specific phase of spatial learning induces apoptotic cell death in the dentate gyrus</i></b>                                   |                                                         |                  |                                                                                 |                                             |                                                       |
| 1                       | Influence of spatial learning on cell death in the dentate gyrus                                                                     | BrdU on D1-D4                                           | 50               | Control = 7<br>Yoked = 6<br>Learning = 8                                        | 8 days                                      | 9 <sup>th</sup> day                                   |
| 2                       | Influence of cue learning on cell death in the dentate gyrus                                                                         |                                                         |                  | Control = 5<br>Yoked = 5<br>Learning = 5<br>Visible PF = 5                      | 6 days                                      | 7 <sup>th</sup> day                                   |
| 3                       | Influence of the different phases of spatial learning on cell death in the dentate gyrus                                             | BrdU on D1-D3                                           | 50               | Control = 8<br>Learning = 10                                                    | 3 days                                      | 3 <sup>rd</sup> day                                   |
| 4                       | “                                                                                                                                    | BrdU on D1-D3                                           | 50               | Control = 9<br>Learning = 15                                                    | 4 days                                      | 4 <sup>th</sup> day                                   |
| 5                       | “                                                                                                                                    | BrdU on D1-D3                                           | 50               | Control = 9<br>Learning = 14                                                    | 5 days                                      | 5 <sup>th</sup> day                                   |
| 6                       | “                                                                                                                                    | BrdU on D1-D3                                           | 50               | Control = 8<br>Learning = 13                                                    | 6 days                                      | 6 <sup>th</sup> day                                   |
| <b>Results section:</b> | <b><i>Spatial learning promotes the death of newborn neurons within a certain time window</i></b>                                    |                                                         |                  |                                                                                 |                                             |                                                       |
| 7a                      | Identification of the time window sensitive to learning-induced cell death                                                           | BrdU on - D3                                            | 100              | Control = 8<br>Learning = 6                                                     | 5 days                                      | 5 <sup>th</sup> day                                   |
| 7b                      | “                                                                                                                                    | BrdU on - D4                                            | 100              | Control = 5<br>Learning = 5                                                     | 5 days                                      | 5 <sup>th</sup> day                                   |
| <b>Results section:</b> | <b><i>Learning-induced apoptosis is critical for spatial memory</i></b>                                                              |                                                         |                  |                                                                                 |                                             |                                                       |
| 8                       | Influence of zVAD on spatial learning                                                                                                | BrdU on D1-D3                                           | 50               | Control Veh = 9<br>Learning Veh = 12<br>Control zVAD = 10<br>Learning zVAD = 12 | 6 days +<br>1 day probe test<br>& cued test | 7 <sup>th</sup> day                                   |
| 9                       | Analysis of non specific effect of zVAD on spatial learning                                                                          |                                                         |                  | Learning Veh = 8<br>Learning zVAD = 10                                          | 6 days +<br>1 day probe test                | 7 <sup>th</sup> day                                   |
| 10                      | Analysis of non specific effect of zVAD on hippocampal neurophysiological responsiveness                                             |                                                         |                  | Control Veh = 3<br>Control zVAD = 4                                             |                                             |                                                       |
| <b>Results section:</b> | <b><i>Learning-induced increases in apoptosis, cell proliferation and survival of newborn neurons are interrelated processes</i></b> |                                                         |                  |                                                                                 |                                             |                                                       |
| 11                      | Analysis of relationship between learning-induced increase in cell survival and cell death                                           | IdU on - D7<br>CldU on - D3                             | 57.65<br>42.76   | Control Veh = 5<br>Learning Veh = 9<br>Control zVAD = 6<br>Learning zVAD = 8    | 6 days                                      | 7 <sup>th</sup> day                                   |
