# Supplementary material
Source: PubMed Central journal article supplement (PMC1945064)
Supplement: pbio.0050214.st002.pdf [file pbio.0050214.st002.pdf]

| <b>Zone</b>                 | <b>% Dying cells</b> |
|-----------------------------|----------------------|
| Subgranular layer           | 74.87±5.25           |
| Internal granule cell layer | 9.90±3.04            |
| Medial granule cell layer   | 6.96±4.26            |
| External granule cell layer | 8.27±3.51            |

Dupret et al – Supplementary Table S2
