# Supplementary material
Source: PubMed Central journal article supplement (PMC1945064)
Supplement: pbio.0050214.st003.pdf [file pbio.0050214.st003.pdf]

| Groups   | CA3 subfield                 |                             | CA1 subfield                 |                             |
|----------|------------------------------|-----------------------------|------------------------------|-----------------------------|
|          | <i>Fractin-IR cells (Nb)</i> | <i>Apoptotic cells (Nb)</i> | <i>Fractin-IR cells (Nb)</i> | <i>Apoptotic cells (Nb)</i> |
| Control  | 5.71±2.97                    | 47.14±13.04                 | 15.71±2.97                   | 81.42±9.61                  |
| Yoked    | 8.33±1.66                    | 58.33±12.49                 | 18.33±5.42                   | 76.66±14.52                 |
| Learning | 6.66±3.33                    | 41.11±6.33                  | 21.11±4.54                   | 91.11±8.75                  |

Dupret et al – Supplementary Table S3
