# Supplementary material
Source: PubMed Central journal article supplement (PMC1945064)
Supplement: pbio.0050214.st004.pdf [file pbio.0050214.st004.pdf]

| Batches | Number of BrdU-IR cells |                | Statistical significance |
|---------|-------------------------|----------------|--------------------------|
|         | Control                 | Learning       |                          |
| 3       | 3412.50±238.05          | 3804.01±273.04 | $t_{16}=1.05, p>0.30$    |
| 4       | 3306.66±391.18          | 3633.33±253.30 | $t_{22}=0.73, p>0.47$    |
| 5       | 3131.11±327.24          | 3377.85±266.99 | $t_{21}=0.58, p>0.56$    |
| 6       | 3933.75±279.01          | 4049.23±453.88 | $t_{19}=0.18, p>0.85$    |

Dupret et al – Supplementary Table S4.
