# Supplementary material
Source: PubMed Central journal article supplement (PMC1945064)
Supplement: pbio.0050214.st005.pdf [file pbio.0050214.st005.pdf]

| Behavioral parameters                     | Trained rats |            | Statistical significance       |
|-------------------------------------------|--------------|------------|--------------------------------|
|                                           | Vehicle      | zVAD       |                                |
| Probe Test                                |              |            |                                |
| Time to goal (s)                          | 11.59±1.86   | 24.44±4.52 | t <sub>22</sub> =-2.65, p<0.01 |
| Wishaw's index (%)                        | 43.87±8.36   | 23.84±5.35 | t <sub>22</sub> =2.41, p<0.05  |
| Cumulative search error (m/s)             | 4.93±1.81    | 16.26±4.05 | t <sub>22</sub> =-3.12, p<0.01 |
| Path efficiency index (%)                 | 47.25±6.10   | 28.87±4.60 | t <sub>22</sub> =2.63, p<0.01  |
| Average speed (m/s)                       | 0.29±0.02    | 0.29±0.02  | t <sub>22</sub> =0.19, p>0.05  |
| Cued test                                 |              |            |                                |
| Latency to reach the visible platform (s) | 6.49±0.66    | 9.03±0.99  | t <sub>22</sub> =-1.83, p>0.05 |

Dupret et al – Supplementary Table S5
