# Supplementary material
Source: PubMed Central journal article supplement (PMC1945064)

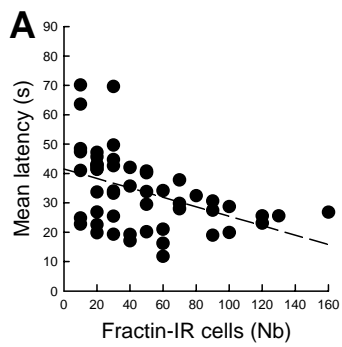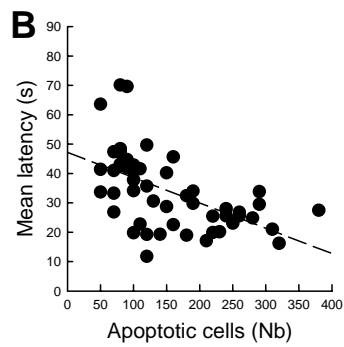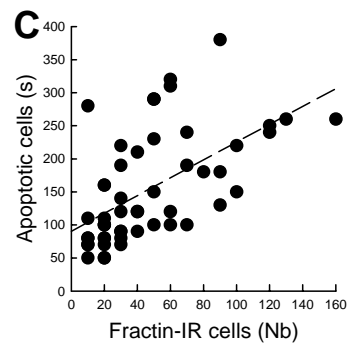

Dupret et al – Supplementary Fig. S1

Supplement: pbio.0050214.sg001.pdf [file pbio.0050214.sg001.pdf]

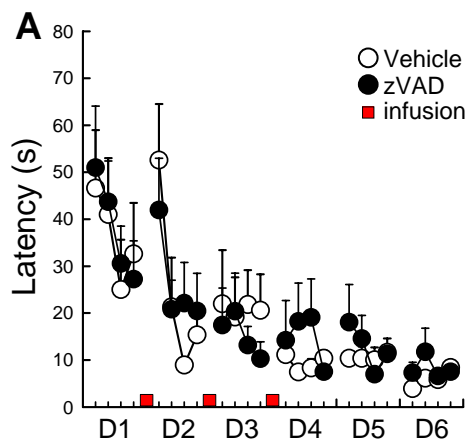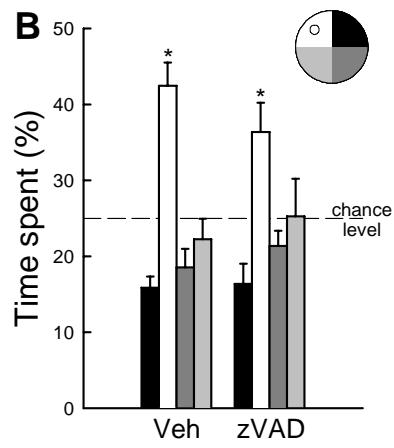

Dupret et al – Supplementary Fig. S2

Supplement: pbio.0050214.sg002.pdf [file pbio.0050214.sg002.pdf]

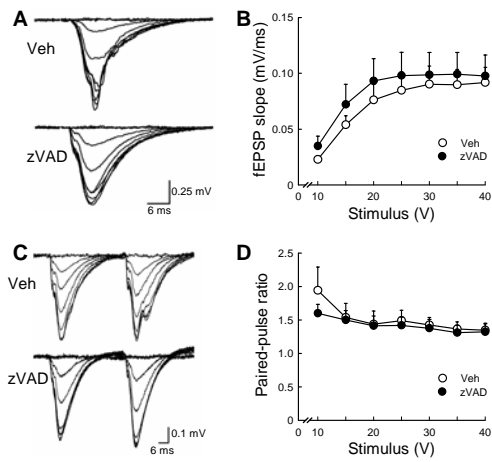

Dupret et al – Supplementary Fig. S3

Supplement: pbio.0050214.sg003.pdf [file pbio.0050214.sg003.pdf]

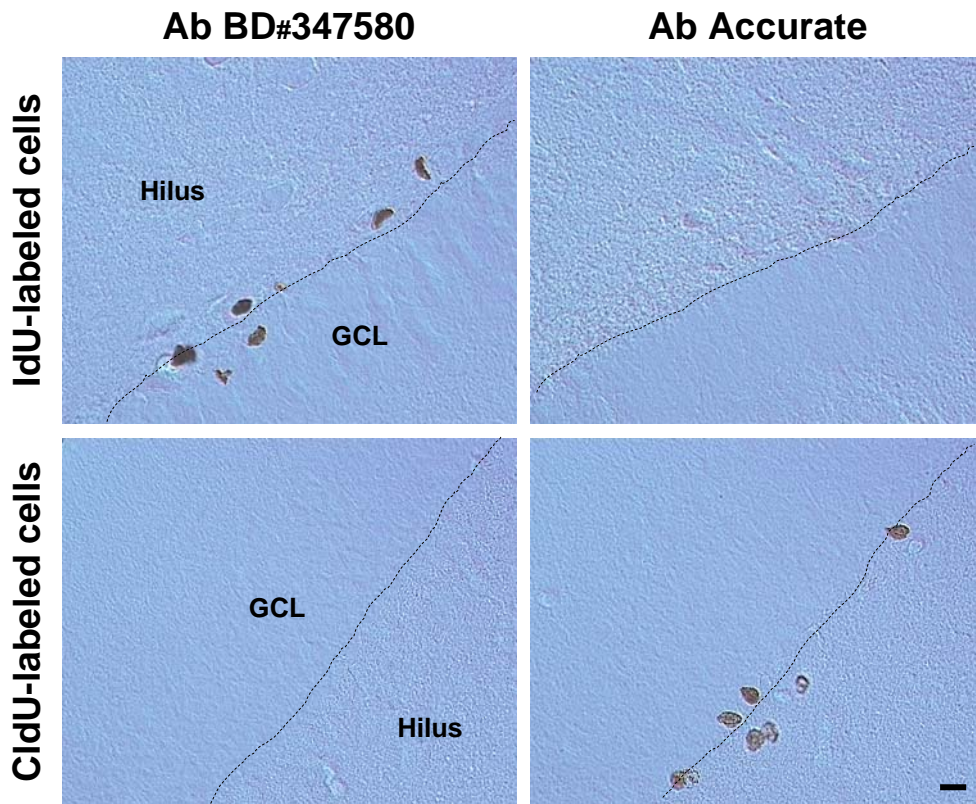

Dupret et al – Supplementary Fig. S4

Supplement: pbio.0050214.sg004.pdf [file pbio.0050214.sg004.pdf]
